# Supplementary material for: Selective hydrogenation of amides and imides over heterogeneous Pt-based catalysts
Source: Royal Society of Chemistry journal article supplement (doi:10.1039/d3cy01274c), 2023-12-04
Supplement: d3cy01274c1.pdf [file d3cy01274c1.pdf]

## Selective hydrogenation of amides and imides over heterogeneous Pt-based catalysts

Ruiyang Qu, Shuxin Mao, Jana Weiß, Vita A. Kondratenko, Evgenii V. Kondratenko, Stephan Bartling, Haifeng Qi, Annette-Enrica Surkus, Kathrin Junge\*, and Matthias Beller\*

Leibniz-Institut für Katalyse e.V., Albert-Einstein Straße 29a, 18059 Rostock, Germany

\*Correspondence to: [Kathrin.Junge@catalysis.de](mailto:Kathrin.Junge@catalysis.de); [Matthias.Beller@catalysis.de](mailto:Matthias.Beller@catalysis.de)

### Contents

1. General remarks
2. Solvent screening
3. Time on line plot
4. Catalyst recycling
5. Analysis of catalysts before and after reaction
6. Other substrates
7. Comparison of results in the literatures
8. Characterization data for products
9.  $^1\text{H}$  NMR and  $^{13}\text{C}$  NMR spectra for products
10. References

## 1. General remarks

Unless otherwise stated, reactions were performed in autoclaves. Solvents were used directly without further purification. Gas chromatography was performed on a HP 6890 with a HP5 column (Agilent). NMR spectra were recorded on Bruker AV 300 spectrometers. All chemical shifts ( $\delta$ ) are reported in parts per million (ppm) and coupling constants ( $J$ ) in Hz. All chemical shifts are reported relative to  $\text{CDCl}_3$  peaks ( $\delta$  (ppm) = 7.26 for  $^1\text{H}$  NMR and  $\delta$  (ppm) = 77.16 for  $^{13}\text{C}$  NMR, respectively).

## 2. Solvent screening

Table S1. Hydrogenation of 4-acetylmorpholine in the presence of different solvents.

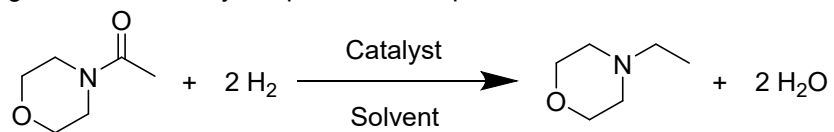

| Entry | Solvent                                                        | Selectivity / % | Yield / % |
|-------|----------------------------------------------------------------|-----------------|-----------|
| 1     | EtOH (>99.9% HPLC grade)                                       | 99              | 80        |
| 2     | EtOH (96% HPLC grade)                                          | 94              | 15        |
| 3     | EtOH (>99.9% HPLC grade, 1.92 mL) + H <sub>2</sub> O (0.08 mL) | 92              | 22        |
| 4     | MeOH                                                           | 0               | 0         |
| 5     | <i>i</i> -PrOH                                                 | 63              | 41        |
| 6     | 2-MeTHF                                                        | 27              | 3         |
| 7     | DME                                                            | 71              | 39        |
| 8     | 1,4-Dioxane                                                    | 96              | 43        |
| 9     | Cyclohexane                                                    | 60              | 25        |
| 10    | Toluene                                                        | 72              | 31        |

Reaction conditions: 4-acetylmorpholine (0.5 mmol), Pt-MoO<sub>x</sub>/TiO<sub>2</sub> catalyst (2 mol% Pt), solvent (2 mL), reaction temperature (120 °C), H<sub>2</sub> pressure (50 bar), reaction time (16 h). Yield was determined by GC-FID using *n*-hexadecane as an internal standard.

### 3. Time on line plot

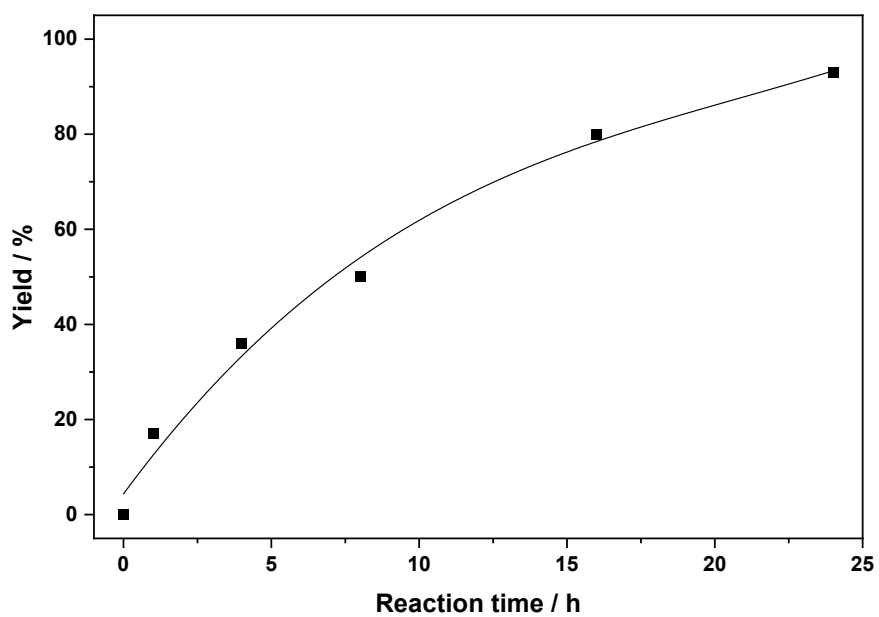

Figure. S1 Time on line plot. Reaction conditions: 4-acetylmorpholine (0.5 mmol), Pt-MoO<sub>x</sub>/TiO<sub>2</sub> catalyst (2 mol% Pt), ethanol (2 mL), reaction temperature (120 °C), H<sub>2</sub> pressure (50 bar). Yield was determined by GC-FID using *n*-hexadecane as an internal standard.

#### 4. Catalyst recycling

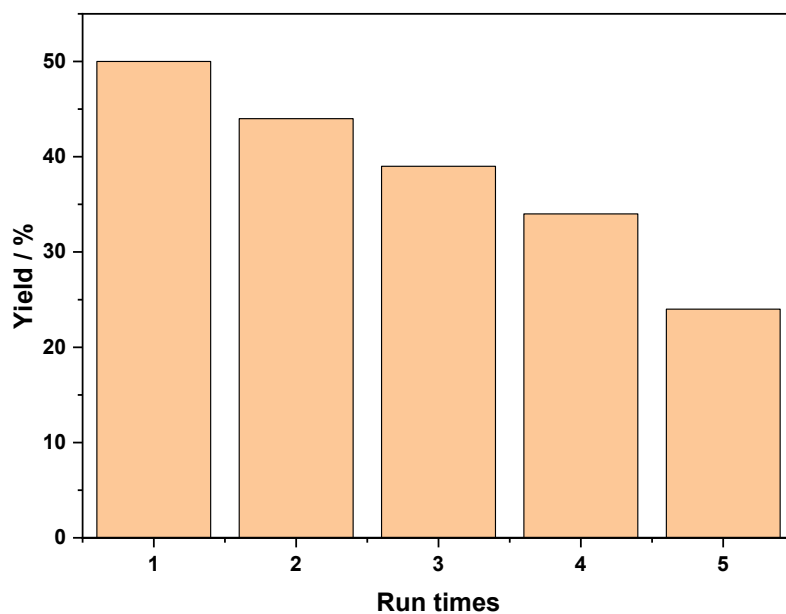

Figure. S2 Catalyst recycling. Reaction conditions: 4-acetylmorpholine (0.5 mmol), Pt-MoO<sub>x</sub>/TiO<sub>2</sub> catalyst (2 mol% Pt), ethanol (2 mL), reaction temperature (120 °C), H<sub>2</sub> pressure (50 bar), reaction time (8 h). Yield was determined by GC-FID using *n*-hexadecane as an internal standard.

## 5. Analysis of catalysts before and after reaction

ICP-OES was performed on Pt-MoO<sub>x</sub>/TiO<sub>2</sub> catalysts before and after reaction to explore the possible leaching during the reaction. Each sample was tested twice to reduce the error. As shown in Table S2, slight Pt leaching is observed while Mo leaching is negligible. Hence the slight decrease of activity during the cycles might be mainly due to Pt leaching.

Table S2. ICP-OES analysis of Pt-MoO<sub>x</sub>/TiO<sub>2</sub> catalysts before and after reaction.

| Samples                                               | Pt loading (wt%) |                 |         | Mo loading (wt%) |                 |         |
|-------------------------------------------------------|------------------|-----------------|---------|------------------|-----------------|---------|
|                                                       | 1 <sup>st</sup>  | 2 <sup>nd</sup> | average | 1 <sup>st</sup>  | 2 <sup>nd</sup> | average |
| Pt-MoO <sub>x</sub> /TiO <sub>2</sub> before reaction | 4.74             | 4.74            | 4.74    | 2.49             | 2.49            | 2.49    |
| Pt-MoO <sub>x</sub> /TiO <sub>2</sub> after reaction  | 4.57             | 4.65            | 4.61    | 2.47             | 2.51            | 2.49    |

XPS measurements were performed for the catalyst after reaction as well. The results were summarized in Table S3. After reaction, the ratio of Pt<sup>0</sup> and Mo<sup>5+</sup> species increased, which is mostly likely due to the reducing atmosphere during the reaction, leading to the *in situ* reduction of Pt and Mo. As stated in the manuscript, the increasing amount of Mo<sup>5+</sup> during the reaction would favor the adsorption and activation of C=O bond in amide. Hence this could also be one of the reasons why the developed Pt-MoO<sub>x</sub>/TiO<sub>2</sub> catalyst works at a relatively mild reaction condition.

Table S3. Summary of XPS analysis of Pt-MoO<sub>x</sub>/TiO<sub>2</sub> catalysts before and after reaction.

| Samples                                               | Pt                                   |                                       | Mo                                    |                                       |
|-------------------------------------------------------|--------------------------------------|---------------------------------------|---------------------------------------|---------------------------------------|
|                                                       | Pt <sup>0</sup> /Pt <sub>total</sub> | Pt <sup>2+</sup> /Pt <sub>total</sub> | Mo <sup>5+</sup> /Mo <sub>total</sub> | Mo <sup>6+</sup> /Mo <sub>total</sub> |
| Pt-MoO <sub>x</sub> /TiO <sub>2</sub> before reaction | 68%                                  | 32%                                   | 27%                                   | 73%                                   |
| Pt-MoO <sub>x</sub> /TiO <sub>2</sub> after reaction  | 92%                                  | 8%                                    | 40%                                   | 60%                                   |

## 6. Other substrates

Table S4. Hydrogenation of other substrates over Pt-MoO<sub>x</sub>/TiO<sub>2</sub> catalyst.

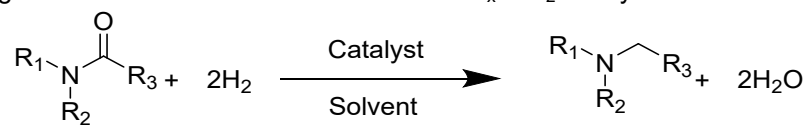

| Entry | Substrate                                                                         | Product                                                                           | Temperature / °C | Time / h | Selectivity / % | Yield / % |
|-------|-----------------------------------------------------------------------------------|-----------------------------------------------------------------------------------|------------------|----------|-----------------|-----------|
| 1     | 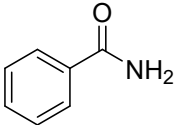 |  | 120              | 24       | 0               | 0         |
| 2     |  |  | 120              | 24       | 92              | 12        |
| 3     |  |  | 120              | 24       | 0               | 0         |
| 4     |  |  | 120              | 24       | 88              | 87        |

Reaction conditions: Substrate: 0.5 mmol, [Pt] catalyst (2 mol%), H<sub>2</sub> (50 bar), EtOH (2 mL). Yield was determined by GC-FID using *n*-hexadecane as an internal standard.

## 7. Comparison of results in the literatures

Table S5. Development of heterogeneous catalysts for amide hydrogenation in recent 15 years.

| No. | Scission | Catalysts                                           | Solvents         | Temperature<br>/ °C | Pressure<br>/ bar H <sub>2</sub> | Time<br>/ h | Conversion<br>/ % | Yield<br>/ % | TON | Additives             | Refs      |
|-----|----------|-----------------------------------------------------|------------------|---------------------|----------------------------------|-------------|-------------------|--------------|-----|-----------------------|-----------|
| 1   | C-O      | Pt-MoO <sub>x</sub> /TiO <sub>2</sub>               | Ethanol          | 120                 | 50                               | 24          | 93                | 92           | 47  | -                     | This work |
| 2   | C-O      | Unsupported Rh/Re                                   | DME              | 160                 | 100                              | 16          | 98                | 88           | 20  | -                     | S1        |
| 3   | C-O      | Unsupported Ru/Re                                   | DME              | 160                 | 100                              | 16          | 95                | 86           | 19  | -                     | S1        |
| 4   | C-O      | Unsupported Rh/Mo                                   | DME              | 160                 | 100                              | 16          | 94                | 89           | 94  | -                     | S2        |
| 5   | C-O      | Rh/Mo/SiO <sub>2</sub>                              | DME              | 160                 | 100                              | 16          | 90                | 81           | 150 | -                     | S2        |
| 6   | C-O      | Rh-MoO <sub>x</sub> /SiO <sub>2</sub>               | DME              | 140                 | 80                               | 8           | >99               | 63           | 51  | CeO <sub>2</sub>      | S3        |
| 7   | C-O      | Unsupported Ru/Mo                                   | DME              | 160                 | 50                               | 16          | 99                | 83           | 20  | -                     | S4        |
| 8   | C-O      | Re/TiO <sub>2</sub>                                 | <i>n</i> -octane | 180                 | 50                               | 24          |                   | 86           | 43  | -                     | S5        |
| 9   | C-O      | PtRe/graphite                                       | DME              | 160                 | 70                               | 20          | >99               | >99          | 200 | -                     | S6        |
| 10  | C-O      | PdRe/ graphite                                      | DME              | 160                 | 70                               | 20          | >99               | >99          | 59  | -                     | S6        |
| 11  | C-O      | PdRe/ graphite                                      | DME              | 140                 | 30                               | 20          | >99               | >99          | 168 | 4Å MS                 | S6        |
| 12  | C-O      | PtRe/TiO <sub>2</sub>                               | Hexane           | 120                 | 20                               | 16          | 100               | 100          | 62  | -                     | S7, S8    |
| 13  | C-O      | Pt/Nb <sub>2</sub> O <sub>5</sub>                   | No solvent       | 180                 | 50                               | 24          | 100               | 99           | 200 | -                     | S9        |
| 14  | C-O      | PtV/HAP                                             | DME              | 70                  | 30                               | 8           | 100               | 99           | 17  | 4Å MS                 | S10       |
| 15  | C-O      | RuWO <sub>x</sub> /MgAl <sub>2</sub> O <sub>4</sub> | CPME             | 200                 | 50                               | 6           | >99               | 83           | 200 | 6 bar NH <sub>3</sub> | S11       |
| 16  | C-O      | Ir/MoO <sub>3</sub> -KIT-6                          | DME              | 130                 | 30                               | 4           | 85                | 84           | 17  | -                     | S12       |
| 17  | C-O      | Ni/LaAlSiO                                          | DME              | 180                 | 40                               | -           | 99                | 97           | -   | -                     | S13       |
| 18  | C-N      | Pd/In <sub>2</sub> O <sub>3</sub>                   | Toluene          | 160                 | 60                               | 15          | >99               | 92           | 13  | -                     | S14       |
| 19  | C-N      | Ru/CeO <sub>2</sub>                                 | H <sub>2</sub> O | 60                  | 80                               | 48          |                   | 93           | 7   | -                     | S15       |
| 20  | C-N      | Ag/γ-Al <sub>2</sub> O <sub>3</sub>                 | 1,4-dioxane      | 150                 | 50                               | 48          | 99                | 96           | 40  | <i>t</i> -BuOK        | S16       |

DME: 1,2-dimethoxyethane

CPME: cyclopentyl methyl ether



## 8. Characterization data for products

Table 2, entry 9

### *N,N*-dimethylaniline hydrochloride

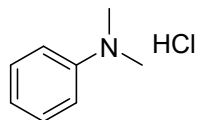

$^1\text{H}$  NMR (300 MHz,  $\text{CDCl}_3$ )  $\delta$  (ppm) 7.76 (d,  $J = 8.2$  Hz, 2H), 7.43 (d,  $J = 7.6$  Hz, 3H), 3.15 (s, 6H).

$^{13}\text{C}$  NMR (75 MHz,  $\text{CDCl}_3$ )  $\delta$  (ppm) 142.85, 130.48, 130.15, 120.78, 46.69.

Table 2, entry 10

### *N*-methyl-*N*-phenylaniline

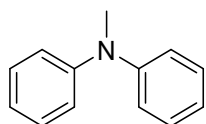

$^1\text{H}$  NMR (300 MHz,  $\text{CDCl}_3$ )  $\delta$  (ppm) 7.36 – 7.26 (m, 4H), 7.10 – 7.03 (m, 4H), 7.03 – 6.95 (m, 2H), 3.35 (s, 3H).

$^{13}\text{C}$  NMR (75 MHz,  $\text{CDCl}_3$ )  $\delta$  (ppm) 149.1, 129.3, 121.5, 120.6, 77.6, 77.2, 76.7, 40.4.

Table 2, entry 13

### 1-methylpyrrolidin-2-one

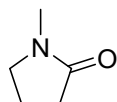

$^1\text{H}$  NMR (300 MHz,  $\text{CDCl}_3$ )  $\delta$  (ppm) 3.42 – 3.34 (m, 2H), 2.84 (s, 3H), 2.38 (t,  $J = 8.1$  Hz, 2H), 2.08 – 1.97 (m, 2H).

$^{13}\text{C}$  NMR (75 MHz,  $\text{CDCl}_3$ )  $\delta$  (ppm) 175.42, 49.63, 30.82, 29.75, 17.78.

Table 2, entry 15

### octahydro-1*H*-isoindol-1-one

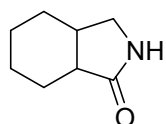

$^1\text{H}$  NMR (300 MHz,  $\text{CDCl}_3$ )  $\delta$  (ppm) 7.04 (s, 1H), 3.33 (dd,  $J = 9.7, 6.0$  Hz, 1H), 2.90 (dt,  $J = 9.4, 1.9$  Hz, 1H), 2.44 – 2.26 (m, 2H), 2.01 – 1.89 (m, 1H), 1.66 (dtdd,  $J = 11.3, 6.2, 2.9, 1.2$  Hz, 1H), 1.59 – 1.37 (m, 3H), 1.32 – 1.13 (m, 3H).

$^{13}\text{C}$  NMR (75 MHz,  $\text{CDCl}_3$ )  $\delta$  (ppm) 180.15, 46.51, 41.15, 34.86, 27.82, 23.74, 23.17, 23.01.

## 9. $^1\text{H}$ NMR and $^{13}\text{C}$ NMR spectra for products

### Original spectra for *N,N*-dimethylaniline hydrochloride:

230328.f308.10.fid  
Ruiyang Qu RQ-R-1397 new  
PROTON CDCl<sub>3</sub> {C:\Bruker\TopSpin3.6.2} 2303 8

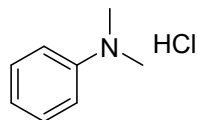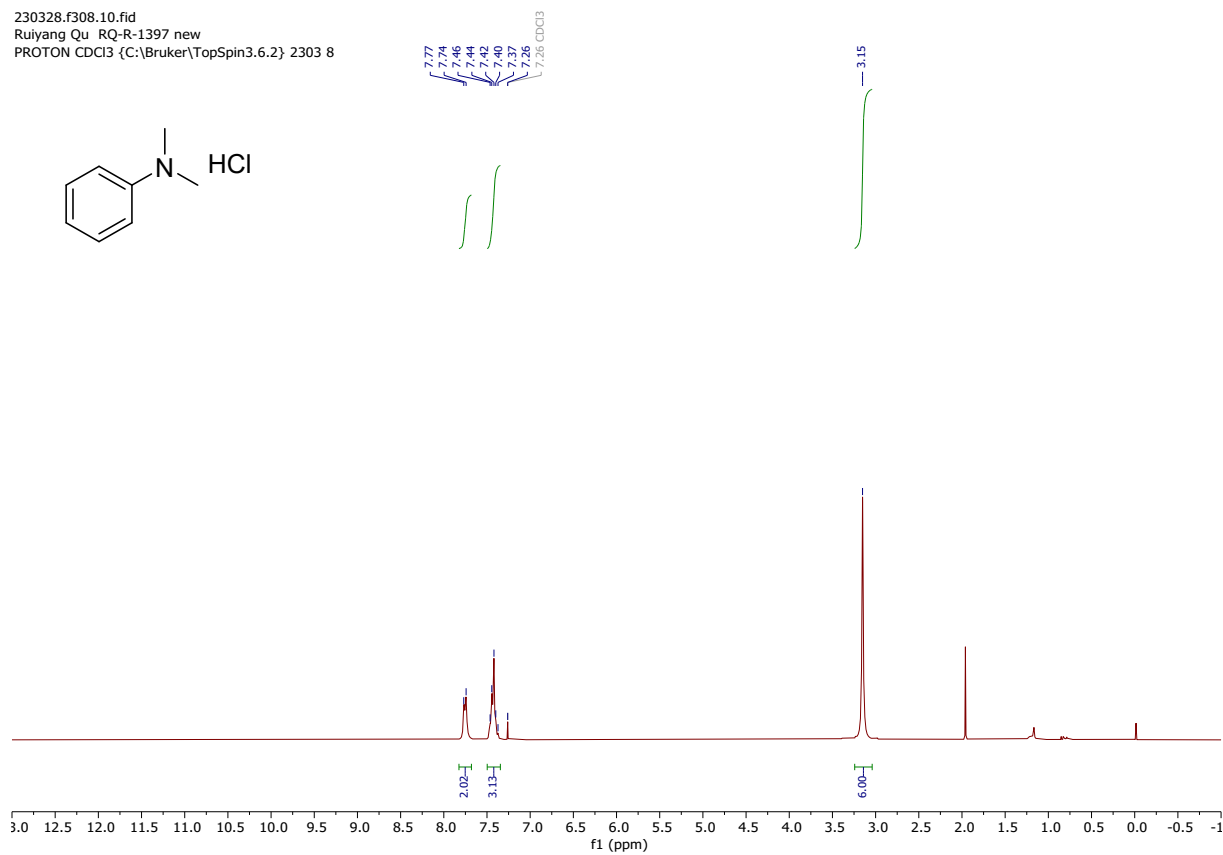

230328.f308.11.fid  
Ruiyang Qu RQ-R-1397 new  
C13CPD CDCl<sub>3</sub> {C:\Bruker\TopSpin3.6.2} 2303 8

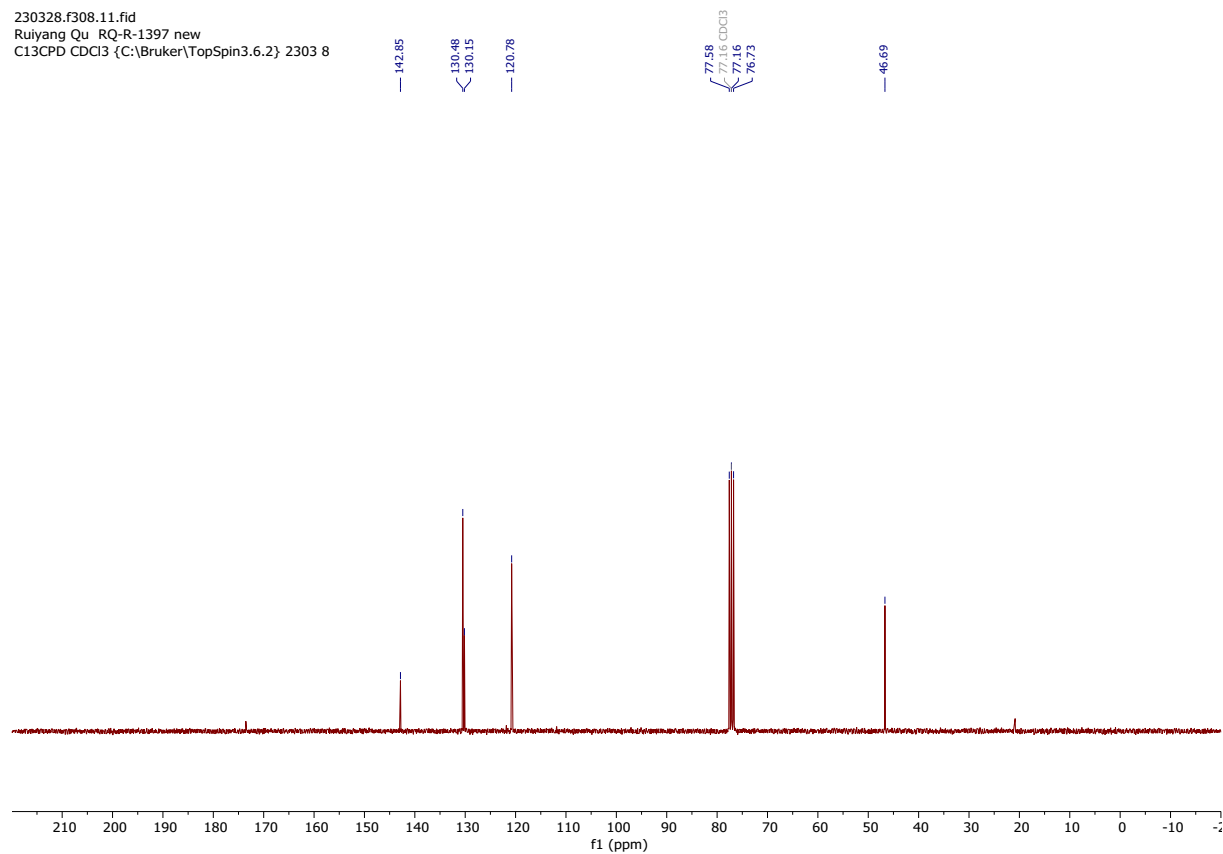

# Original spectra for *N*-methyl-*N*-phenylaniline:

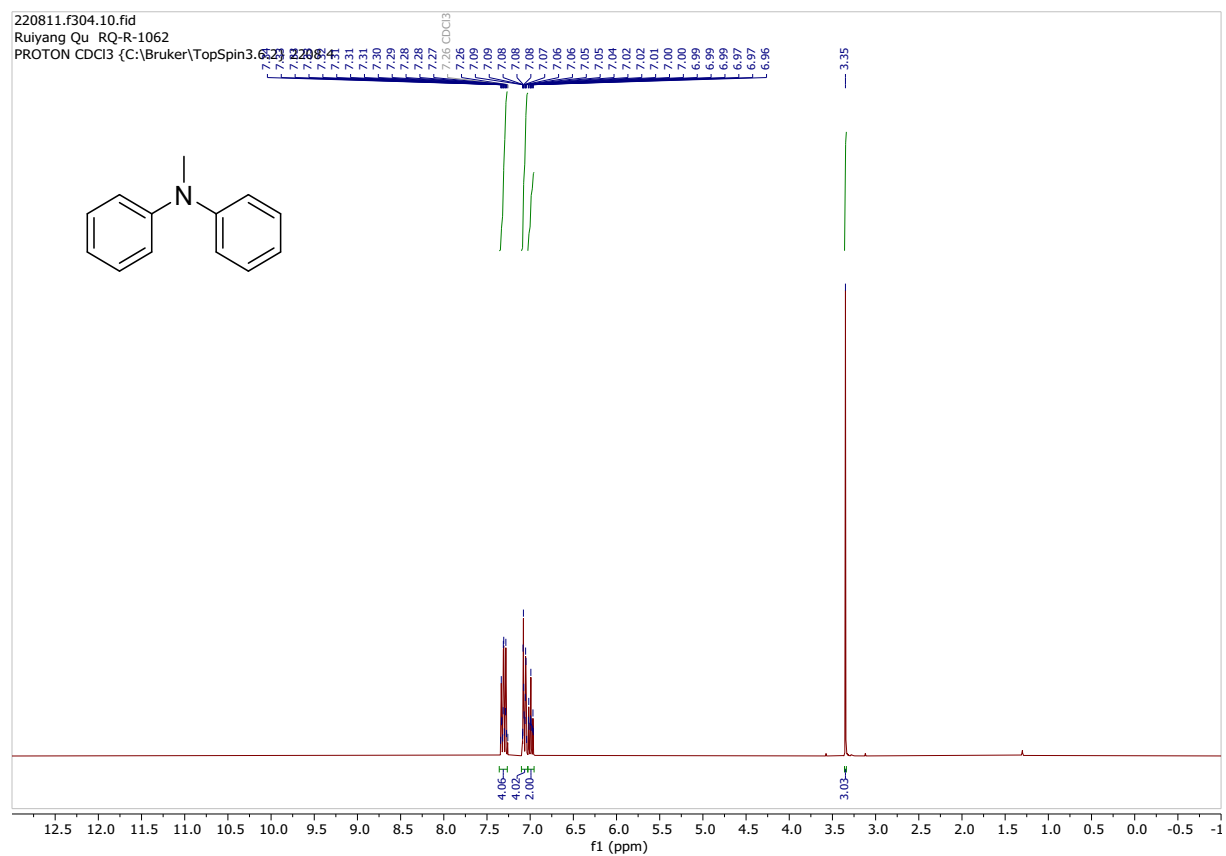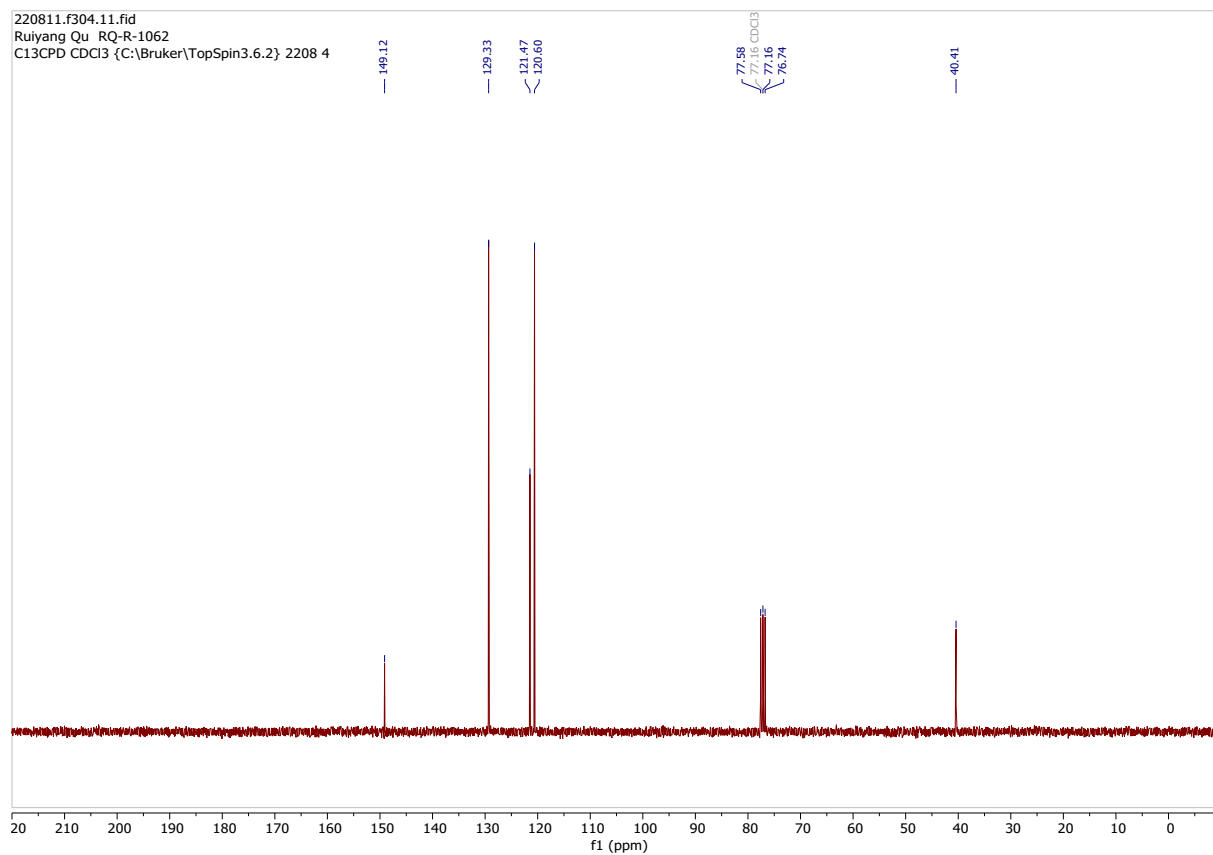

# Original spectra for 1-methylpyrrolidin-2-one:

221222.303.10.fid  
Ruiyang Qu / RQ-R-1213  
Au1H CDCl3 {C:\Bruker\TopSpin3.6.2} 2212 3

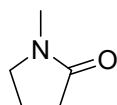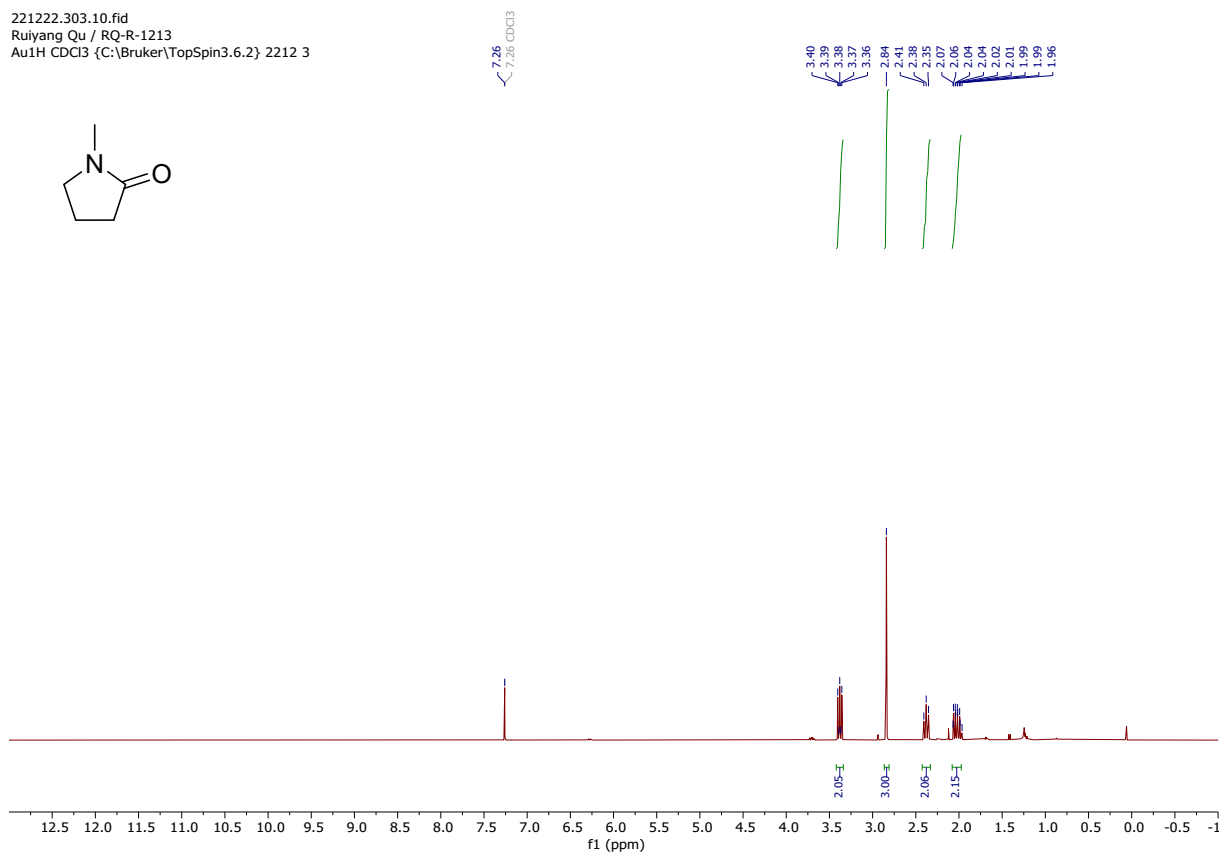

221222.303.11.fid  
Ruiyang Qu / RQ-R-1213  
Au13C CDCl3 {C:\Bruker\TopSpin3.6.2} 2212 3

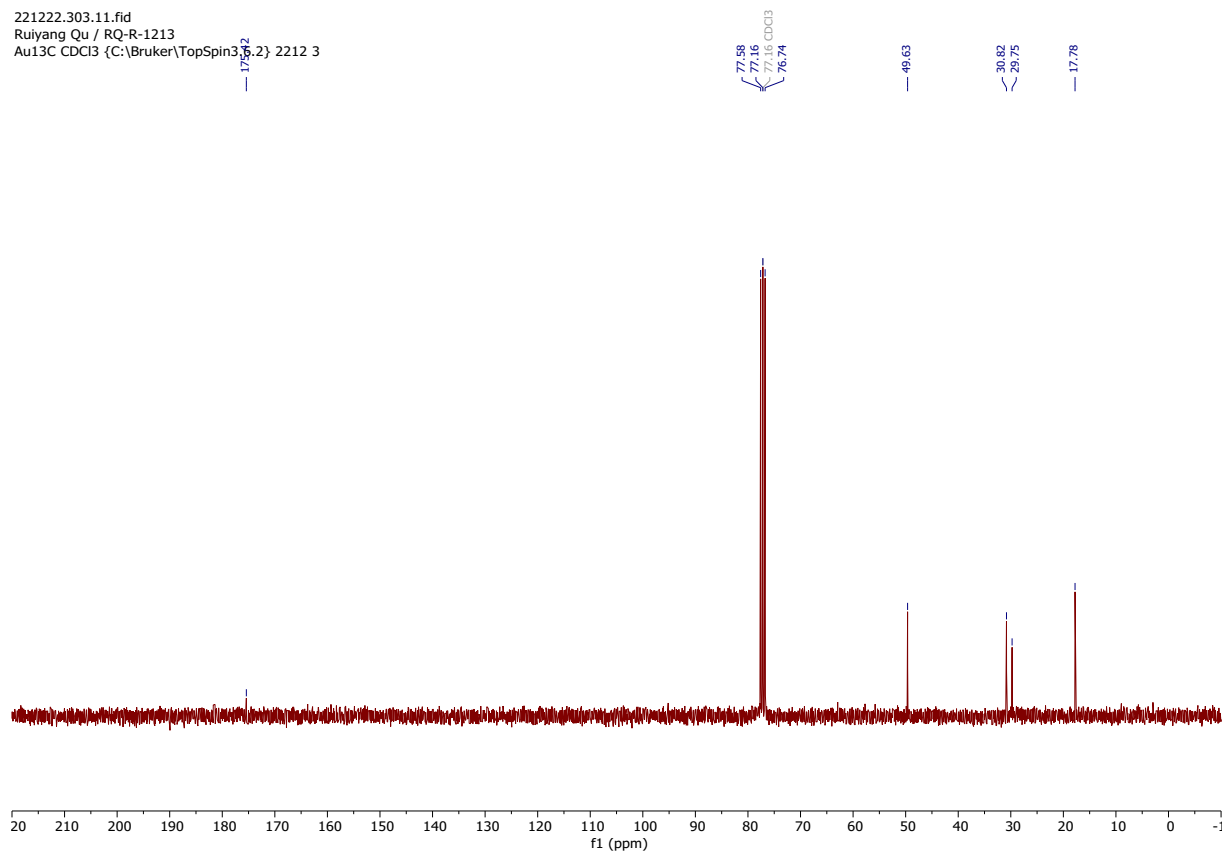

# Original spectra for octahydro-1H-isindol-1-one:

221222.302.10.fid  
Ruiyang Qu / RQ-R-1217  
Au13C CDCl3 {C:\Bruker\TopSpin3.6.2\221222.302.10}

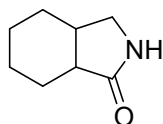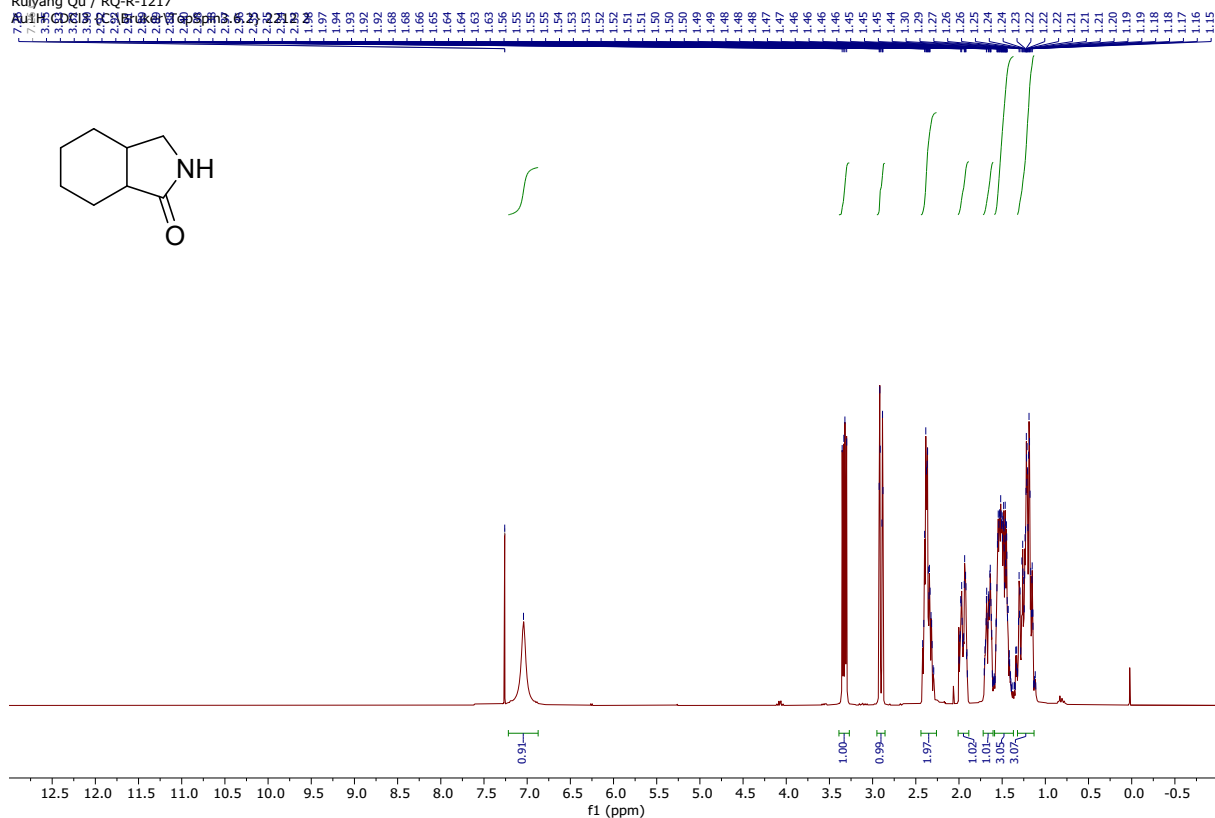

221222.302.11.fid  
Ruiyang Qu / RQ-R-1217  
Au13C CDCl3 {C:\Bruker\TopSpin3.6.2\221222.302.11}

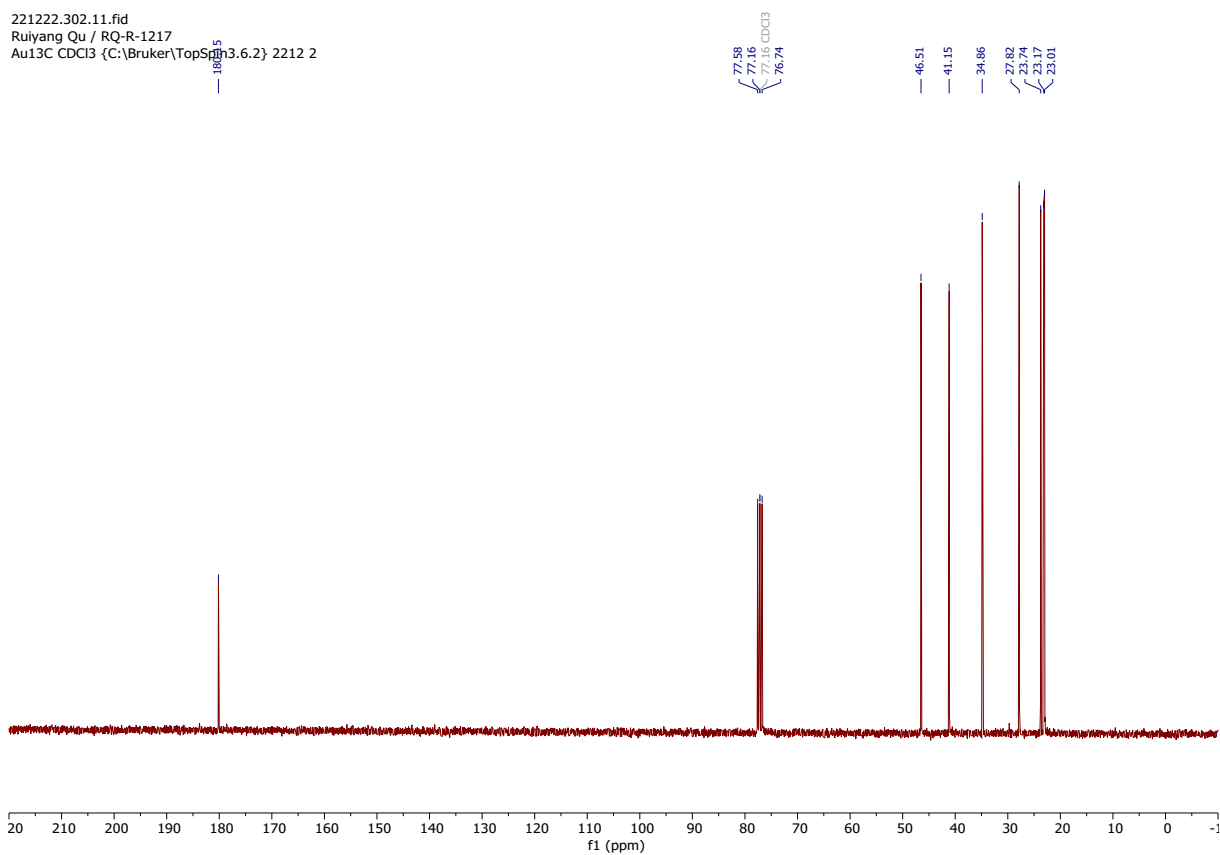

## 10. References

- S1. G. Beamson, A. J. Papworth, C. Philipps, A. M. Smith and R. Whyman, *J. Catal.*, 2011, **278**, 228-238.
- S2. G. Beamson, A. J. Papworth, C. Philipps, A. M. Smith and R. Whyman, *J. Catal.*, 2010, **269**, 93-102.
- S3. Y. Nakagawa, R. Tamura, M. Tamura and K. Tomishige, *Sci. Technol. Adv. Mater.*, 2015, **16**, 014901.
- S4. G. Beamson, A. J. Papworth, C. Philipps, A. M. Smith and R. Whyman, *Adv. Synth. Catal.*, 2010, **352**, 869-883.
- S5. T. Toyao, S. M. A. H. Siddiki, Y. Morita, T. Kamachi, A. S. Touchy, W. Onodera, K. Kon, S. Furukawa, H. Ariga, K. Asakura, K. Yoshizawa and K.-i. Shimizu, *Chem. Eur. J.*, 2017, **23**, 14848-14859.
- S6. M. Stein and B. Breit, *Angew. Chem. Int. Ed.*, 2013, **52**, 2231-2234.
- S7. R. Burch, C. Paun, X. M. Cao, P. Crawford, P. Goodrich, C. Hardacre, P. Hu, L. McLaughlin, J. Sá and J. M. Thompson, *J. Catal.*, 2011, **283**, 89-97.
- S8. J. Coetzee, H. G. Manyar, C. Hardacre and D. J. Cole-Hamilton, *ChemCatChem*, 2013, **5**, 2843-2847.
- S9. K.-i. Shimizu, W. Onodera, A. S. Touchy, S. M. A. H. Siddiki, T. Toyao and K. Kon, *ChemistrySelect*, 2016, **1**, 736-740.
- S10. T. Mitsudome, K. Miyagawa, Z. Maeno, T. Mizugaki, K. Jitsukawa, J. Yamasaki, Y. Kitagawa and K. Kaneda, *Angew. Chem. Int. Ed.*, 2017, **56**, 9381-9385.
- S11. R. Coeck, S. Berden and D. E. De Vos, *Green Chem.*, 2019, **21**, 5326-5335.
- S12. T. Chen, Z. Shi, G. Zhang, H. C. Chan, Y. Shu, Q. Gao and Y. Tang, *ACS Appl. Mater. Interf.*, 2018, **10**, 42475-42483.
- S13. S. Li, H. Chen, M. Wen and J. Shen, *J. Catal.*, 2016, **338**, 1-11.
- S14. I. Sorribes, S. C. S. Lemos, S. Martín, A. Mayoral, R. C. Lima and J. Andrés, *Catal. Sci. Technol.*, 2019, **9**, 6965-6976.
- S15. M. Tamura, S. Ishikawa, M. Betchaku, Y. Nakagawa and K. Tomishige, *Chem. Commun.*, 2018, **54**, 7503-7506.
- S16. Y. Xie, P. Hu, T. Bendikov and D. Milstein, *Catal. Sci. Technol.*, 2018, **8**, 2784-2788.
